# The Effects of Winter Recreation on Alpine and Subalpine Fauna: A Systematic Review and Meta-Analysis

Chloe F. Sato<sup>1\*</sup>, Jeff T. Wood<sup>1</sup>, David B. Lindenmayer<sup>1,2</sup>

<sup>1</sup> Fenner School of Environment and Society, The Australian National University, Canberra, Australia, <sup>2</sup> ARC Centre of Excellence for Environmental Decisions, The Australian National University, Canberra, Australia

## Abstract

The ski industry is often perceived as having a negative impact on sensitive alpine and subalpine communities. However, empirical evidence of such impacts is lacking. We reviewed the available literature from the last 35 years to quantify the reported effects of winter recreation on faunal communities. Overall, using one-sample binomial tests ('sign tests') we found that the effects of all types of winter recreation-related disturbances (i.e. ski runs, resort infrastructure and winter tourism) were more likely to be negative or have no effect, than be positive for wildlife. More specifically, in Europe, where the majority of the available research was conducted, the impacts of winter recreation were most often negative for fauna. In terms of specific taxa, birds and to a lesser extent mammals and arthropods, responded negatively to disturbance. Results from our meta-analysis confirmed the results from our binomial tests. Richness, abundance and diversity of fauna were lower in areas affected by winter recreation when compared with undisturbed areas. For most regions and taxa, however, empirical evidence remains too limited to identify clear impacts of winter recreation. We therefore conclude that the majority of ski resorts are operating in the absence of knowledge needed to inform effective strategies for biodiversity conservation and ecologically-sound management. Thus, there is an urgent need for more empirical research to be conducted throughout this increasingly threatened ecological community, especially given the indication from the available literature that fauna often respond negatively to winter recreation.

**Citation:** Sato CF, Wood JT, Lindenmayer DB (2013) The Effects of Winter Recreation on Alpine and Subalpine Fauna: A Systematic Review and Meta-Analysis. PLoS ONE 8(5): e64282. doi:10.1371/journal.pone.0064282

**Editor:** Regina Lindborg, Stockholm University, Sweden

**Received:** November 20, 2012; **Accepted:** April 13, 2013; **Published:** May 15, 2013

**Copyright:** © 2013 Sato et al. This is an open-access article distributed under the terms of the Creative Commons Attribution License, which permits unrestricted use, distribution, and reproduction in any medium, provided the original author and source are credited.

**Funding:** The corresponding author (C. Sato) was supported by the Glenn Sanecki Alpine Scholarship to carry out this research. The funders had no role in study design, data collection and analysis, decision to publish, or preparation of the manuscript.

**Competing Interests:** The authors have declared that no competing interests exist.

\* E-mail: chloe.sato@anu.edu.au

## Introduction

Alpine ecosystems are significant for biodiversity [1,2,3] but only cover between 5.2–7.9% of the Earth's terrestrial landmass (excluding the Antarctic landmass; [4,5]). Many alpine and subalpine environments support highly endemic communities of taxa [6,7] such as reptiles [8], birds [9,10] and invertebrates [11,12]. These ecosystems are also thought to be sensitive to human development [13,14,15,16], domestic livestock grazing [17], invasive species [18] and intensive wildfires [19]. In addition, these environments are expected to be significantly affected by climate change [20,21]. Under a conservative scenario of only 1°C global temperature increase, some authors predict a 150 m retraction of the snow line up the mountains [22,23,24]. Severe global warming scenarios (IPCC scenario A1B; [20]) predict that global temperatures may increase by 1.5–2.4°C by 2050 [20,24]. This could see snow lines retract by as much as 220–360 m upslope (based on figures provided by [20,22,23,24]). Indeed, snow line retractions may be even more severe than predicted when other factors such as snow-pack variability, North Atlantic Oscillations and El Niño/La Niña are considered [25,26].

The ski industry is already implementing climate adaptation strategies (e.g. artificial snow making and the introduction of high capacity ski lifts that can access higher elevation ski runs) to

increase longevity of winter tourism activities [20,22,27]. These adaptation strategies may adversely affect fauna [20] by limiting the area of undisturbed habitat available for endemic species, especially those sensitive to human disturbances (e.g. Mountain Pygmy Possum, *Burramys parvus*, in south-eastern Australia [28,29]).

Effective management and conservation of alpine and subalpine systems requires high quality empirical information to guide policy and on-the-ground management interventions. Yet, major knowledge gaps remain in many areas ranging from the biology of alpine organisms [30,31] to the effects of stressors, such as human-induced environmental change, on populations and communities [11,32,33,34].

To date, there has been no systematic review of key threatening processes influencing biodiversity in alpine-subalpine systems, particularly in regards to immediate and direct human-driven impacts potentially arising from tourist resort development and extension. Yet, this information is critical to guiding effective management and evidence-based policies. To address this major knowledge gap, we have conducted a targeted and detailed systematic review and meta-analysis of the global literature to quantify the impacts of ski tourism and ski resort infrastructure on alpine-subalpine wildlife. To this end, we asked the following key questions:

- 1) Which taxa appear to be most heavily affected by alpine and/or subalpine development?
- 2) Are there regional patterns in biotic response with some areas experiencing greater impact than others?
- 3) Is the nature of the impact consistent across different winter recreation-related disturbances?

## Methods

For the purposes of this review, we classify alpine and subalpine areas using the globally applicable definitions provided by Löve (1970; [5]). She defines an alpine area as the zone above the limit of physiological tree growth (the treeline) and a subalpine area as the natural belt that lies between the treeline (at its upper limit) and the closed montane forest (at its lower limit).

We focused this review on studies that generated empirical data on the impacts of human disturbances on terrestrial vertebrate and invertebrate taxa of alpine and subalpine areas around the world. Human disturbances included ski-related developments (such as roads, buildings and ski-lifts; henceforth termed ‘Resort Infrastructure’), direct mountain management and modification (such as slope and snow grooming; henceforth termed ‘Ski Runs’), and direct human impact from winter recreational sports (including snow-shoeing, skiing, snowboarding and over-snow vehicle use; henceforth termed ‘Winter Tourism’).

## Literature Search

Due to the broad, geographical nature of our review (see Figure 1), obtaining all the “grey” literature on the impacts of ski resorts on alpine and subalpine fauna was not feasible. As such, we only used the peer-reviewed primary literature as identified via electronic databases for our analyses.

We searched four major electronic databases - Web of Science (1945-present), Zoological Record Plus (1978-present), ProQuest: Science and Technology Databases (1967-present) and CAB Abstracts (1973-present) - on the 16<sup>th</sup> April 2012 using the

following search string: ((ski slope\* OR ski lift\* OR ski run\* OR ski piste\* OR piste\* OR ski resort\* OR “ski develop\*”) OR (“snow\* sport\*” OR ski sport\* OR winter sport\* OR “winter recreation”) OR (“winter tourism” OR “ski tourism” OR “nature tourism” OR snow tourism) OR (“alpine habitat fragment\*” OR “alpine modification” OR devegetated matrix) OR (“subalpine habitat fragment\*” OR “subalpine modification” OR devegetated matrix) OR (snow AND alps)) AND (fauna\* OR (bird\* OR avifauna\*) OR mammal\* OR (reptil\* OR lizard\*) OR (frog\* OR amphib\*) OR (invertebrat\* OR insect\*)).

We used different combinations of search terms based on the requirements or limitations of each database. No constraints on year of publication or language of publication were imposed on the database searches. We also examined additional, relevant articles collected opportunistically over the previous year.

## Extraction of Data for Analysis

Our systematic literature search was designed to find studies related to the effects of ski resort infrastructure and winter recreation on wildlife. To ensure that we only included articles in the review specifically related to this topic, we used two levels of screening. At the first level of screening, we read titles and abstracts, excluding articles that did not satisfy at least two of the following criteria: 1) Focus on fauna, 2) Mention ski resorts, ski infrastructure or winter sports, 3) Concentrate on alpine or subalpine environments. Full text articles were obtained for all the articles that passed the first level of screening. At the second level of screening we read entire articles, excluding those that did not: 1) include original research focussing on effects of winter recreation-related disturbances on fauna, 2) contain usable, empirical data, or 3) provide statistical analysis of data. At each level of screening, we recorded the number of articles identified and the number of studies included and excluded according to the Preferred Reporting Items for Systematic Reviews and Meta-Analyses (PRISMA) Statement (see Figure 2).

For each of the 41 papers included in the final analysis (see Table 1, Reference List S1), we posed the following questions. (1)

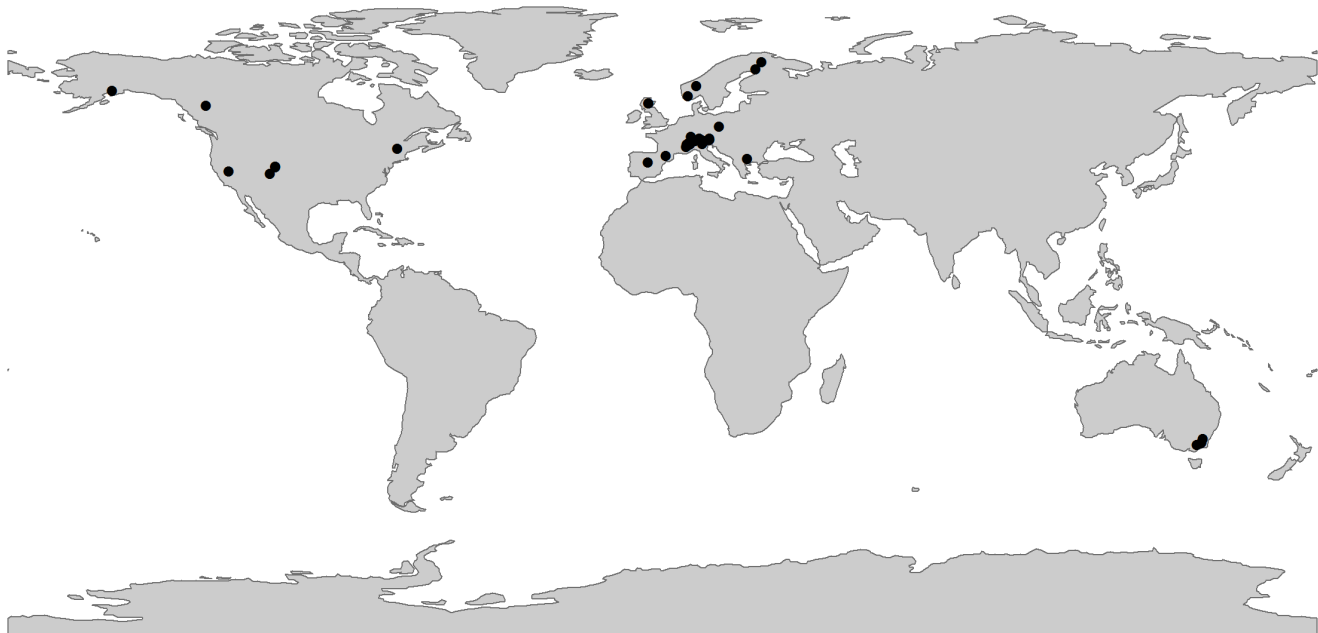

**Figure 1. Global distribution of studies (n = 41) that investigated the effects of winter recreation on wildlife.**  
doi:10.1371/journal.pone.0064282.g001

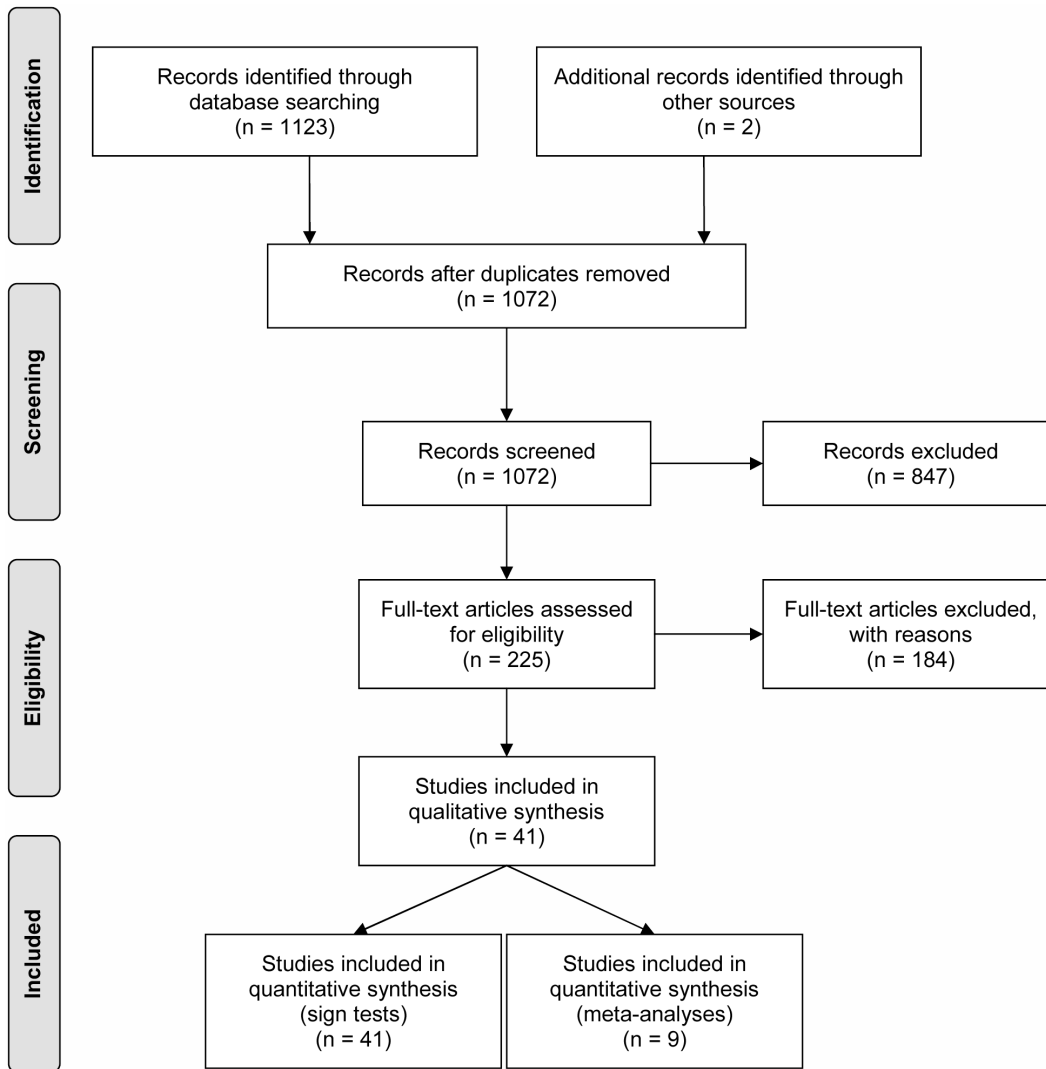

**Figure 2. PRISMA Literature Search Flow Diagram.**

doi:10.1371/journal.pone.0064282.g002

In which country was the study conducted? (2) In what year(s) was the study conducted? (3) What taxonomic group was examined? (4) What type(s) of winter recreation-related disturbance was examined? (5) What measurements were taken to determine the effect of winter recreation? (6) What overall effect on the fauna was observed (as concluded by the author)? (7) What specific effect on fauna was observed for each measure recorded in the study? (8) Were any management recommendations included? We also assigned each paper an experimental design/data quality category (I–IV), as outlined in Table S1. We show the proforma used to extract information from retained articles in Table S1 and PRISMA Checklist in Checklist S1.

### Reporting of Results

We collated the information extracted from each paper in qualitative tables and presented these results using simple tables and bar charts. As 20 different measures of biotic response were reported across the included studies, we recorded the overall effect identified by each individual paper, but also pooled logical subsets of biotic response measures to create four composite categories. In doing so, we could analyse the effects of winter recreation-related

disturbances on specific biotic responses of fauna. The four composite categories analysed were:

- 1) *population and community descriptors*: measures used to describe a population or community of animals (e.g. abundance, diversity, richness and community composition);
- 2) *population viability measures*: measures that may contribute to the persistence and viability of populations (e.g. breeding success, recruitment and survival);
- 3) *fitness measures*: measures that may contribute to the survival of an individual (e.g. body condition, parasite load and sprint speed); and
- 4) *'other' measures*: measures that did not fall under one of the above categories (e.g. habitat use, frequency of occurrence and predicted presence).

Examples of the types of results we recorded as 'positive effect', 'negative effect' and 'no effect' for each of the composite categories are provided in Table S2.

To test the hypothesis that human-generated disturbances were equally likely to have a positive or negative effect on fauna, we

**Table 1.** Details of the 41 studies\* investigating the impacts of winter recreation on alpine and subalpine fauna.

| Author                      | Country             | Taxa               |
|-----------------------------|---------------------|--------------------|
| Amo et al. (2007)           | Spain               | Reptile            |
| Arlettaz et al. (2007)      | Switzerland         | Bird               |
| **Ballenger & Ortega (2001) | USA                 | Bird               |
| Baratti et al. (2000)       | Italy               | Arthropod          |
| Braunisch et al. (2011)     | Switzerland         | Bird               |
| Broome (2001)               | Australia           | Mammal             |
| **Caprio et al. (2011)      | Italy               | Bird               |
| Caravello et al. (2006)     | Italy               | Annelid            |
| Foissner et al. (1982)      | Austria             | Protozoan          |
| Goldstein et al. (2010)     | USA                 | Mammal             |
| Goodrich & Berger (1994)    | USA                 | Mammal             |
| Green (2000)                | Australia           | Mammal             |
| Hadley & Wilson (2004a)     | USA                 | Mammal             |
| Hadley & Wilson (2004b)     | USA                 | Mammal             |
| Haslett (1991)              | Austria             | Arthropod          |
| Haslett (1997)              | Germany             | Arthropod          |
| Jokimaki et al. (2007)      | Finland             | Bird               |
| **Keßler et al. (2012)      | Austria & Germany   | Arthropod          |
| Krebs et al. (2007)         | Canada              | Mammal             |
| Kübelböck & Meyer (1981)    | Austria             | Annelid            |
| **Laiolo & Rolando (2005)   | Italy               | Bird               |
| Lüftenegger et al. (1986)   | Austria             | Protozoan+Nematode |
| Mansergh & Scotts (1989)    | Australia           | Mammal             |
| **Mincheva et al. (2009)    | Bulgaria            | Nematode           |
| Morrison et al. (1995)      | USA                 | Mammal             |
| **Negro et al. (2009)       | Italy               | Arthropod          |
| **Negro et al. (2010)       | Italy               | Arthropod          |
| Nellemann et al. (2000)     | Norway              | Mammal             |
| Patthey et al. (2008)       | Switzerland         | Bird               |
| Reimers et al. (2003)       | Norway              | Mammal             |
| **Rolando et al. (2007)     | Italy               | Bird               |
| Sanecki et al. (2006)       | Australia           | Mammal             |
| Shine et al. (2002)         | Australia           | Reptile            |
| **Strong et al. (2002)      | USA                 | Arthropod          |
| Szymkowiak & Gorski (2004)  | Poland              | Arthropod          |
| Thiel et al. (2007)         | Germany+France      | Bird               |
| Thiel et al. (2008)         | Germany             | Bird               |
| Thiel et al. (2011)         | Germany+Switzerland | Bird               |
| Ukkola et al. (2007)        | Finland             | Mammal+Bird        |
| Watson (1979)               | Scotland            | Mammal+Bird        |
| Watson & Moss (2004)        | Scotland            | Bird               |

\*Complete reference details provided in Reference List S1;

\*\*Indicates studies included in the meta-analyses.

doi:10.1371/journal.pone.0064282.t001

used data from studies that demonstrated clear positive or negative effects on fauna and omitted from analysis ambiguous results (i.e. 'no effect' or variable results). We calculated the proportion of studies that had a positive effect on the focal species or focal community and used one-sample binomial tests ('sign' tests; [35])

to assess whether this proportion was significantly different from 0.50. We performed separate one-sample binomial tests for each of the data sets (continents, taxa, and specific types of winter recreation-related impacts). Data sets with sample sizes of less than six were omitted from our analysis as the statistical power to detect significant differences is likely to be inadequate below this level [36].

The use of one-sample binomial tests allowed us to statistically test broad hypotheses about the effects of winter recreation on fauna despite the variability in the measures reported among included articles [35]. We also conducted a meta-analysis to determine the effect of winter recreation on fauna. We found that only three measures – richness ( $n=8$ ), diversity ( $n=6$ ) and abundance ( $n=7$ ) – had a sufficient number of studies (five or more) that provided the required information (means, standard deviations and sample sizes) to calculate an overall effect size using weighted Hedges'  $d$  [37]. To make these effect sizes ecologically meaningful, we first standardised the reported data so that each study only yielded means and standard deviations for specific taxonomic assemblages (e.g. birds, mammals, arthropods etc.) Thus, for those studies where information was provided for individual species or individual study areas, we combined site-level or species-level means and standard deviations for each measure according to formulae provided by Borenstein et al. [35,p.222]. We then calculated the effect sizes for each study using weighted Hedges'  $d$ , as well as an overall effect size of winter recreation for each measure by combining the effect sizes across studies (see [37,p.16]). We assessed winter recreation as having a statistically significant effect on a given measure if the 95% confidence interval (CI) did not overlap zero. We conducted all meta-analyses using Genstat 15 (VSN International Ltd).

## Results

Our systematic literature search retrieved 1072 articles that were potentially relevant to the review. Of these, we found 847 abstracts to be unrelated to the impacts of winter recreation on wildlife and so we rejected them. We read the remaining 225 articles in full and found a further 184 did not meet our inclusion criteria. Thus, we retained 41 articles for our final analysis (Figure 2).

The 41 articles included in our analysis were sourced from 25 different journals. The majority were published in *Biological Conservation* (14.6%), *Journal of Wildlife Management* (14.6%), *Journal of Applied Ecology* (9.6%) and *Biodiversity and Conservation* (7.3%). All other journals published two or fewer articles related to the

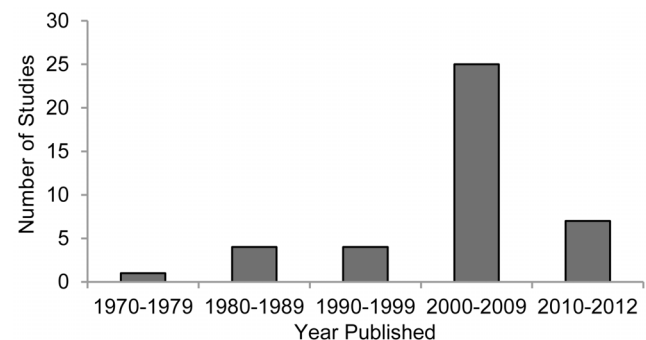

**Figure 3. Publications by decade.** The number of studies ( $n=41$ ) published by decade, investigating the impacts of winter recreation on fauna from 1970 to mid-2012.

doi:10.1371/journal.pone.0064282.g003

**Table 2.** Numbers of published studies that investigated the impacts of winter recreation on wildlife.

| Category                                     |                          | Total | Negative | No Effect | Positive |
|----------------------------------------------|--------------------------|-------|----------|-----------|----------|
| <b>Continent</b>                             |                          |       |          |           |          |
| <b>Europe</b>                                |                          | 28    |          |           |          |
|                                              | Austria*                 | 5     | 8        | 6         | 2        |
|                                              | Italy*                   | 7     | 11       | 8         | 3        |
|                                              | Switzerland*             | 4     | 4        | –         | –        |
|                                              | Bulgaria                 | 1     | –        | 1         | –        |
|                                              | Spain                    | 1     | 1        | 1         | –        |
|                                              | Germany*                 | 5     | 5        | 1         | 1        |
|                                              | Finland                  | 2     | 1        | 2         | 2        |
|                                              | France*                  | 1     | 1        | –         | –        |
|                                              | Norway                   | 2     | 1        | 1         | –        |
|                                              | Poland                   | 1     | –        | 1         | –        |
|                                              | Scotland                 | 2     | 2        | 2         | 1        |
| <b>North America</b>                         |                          | 8     |          |           |          |
|                                              | USA*                     | 7     | 6        | 4         | 4        |
|                                              | Canada*                  | 1     | 1        | 1         | –        |
| <b>Australia</b>                             |                          | 5     | 4        | 1         | 2        |
| <b>Taxon</b>                                 |                          |       |          |           |          |
|                                              | Bird                     | 14    | 13       | 7         | 2        |
|                                              | Mammal                   | 15    | 11       | 8         | 5        |
|                                              | Reptile                  | 2     | 1        | 1         | 1        |
|                                              | Arthropod                | 9     | 12       | 8         | 7        |
|                                              | Annelid                  | 2     | 1        | 1         | –        |
|                                              | Nematode                 | 3     | 2        | 1         | –        |
|                                              | Protozoan                | 2     | 4        | 4         | 1        |
| <b>Biotic Measure</b>                        |                          |       |          |           |          |
| <b>Population &amp; Community Descriptor</b> |                          |       |          |           |          |
|                                              | Abundance                | 11    | 13       | 5         | 2        |
|                                              | Biomass                  | 2     | 1        | 1         | –        |
|                                              | Density                  | 9     | 7        | 7         | 3        |
|                                              | Diversity                | 4     | 3        | 3         | 1        |
|                                              | Richness                 | 11    | 7        | 6         | 1        |
|                                              | Dominant Species         | 3     | 4        | 5         | 4        |
| <b>Population Viability Measure</b>          |                          |       |          |           |          |
|                                              | Breeding Success         | 1     | 1        | 1         | –        |
|                                              | Number of Nests          | 1     | –        | –         | 1        |
|                                              | Distance Travelled       | 5     | 3        | 2         | –        |
|                                              | Recruitment              | 1     | 1        | –         | –        |
|                                              | Survival                 | 4     | 1        | 3         | 2        |
|                                              | Frequency of Abandonment | 1     | 1        | –         | –        |
| <b>Fitness Measure</b>                       |                          |       |          |           |          |
|                                              | Body Condition           | 1     | 1        | –         | –        |
|                                              | Parasite Load            | 1     | –        | 1         | –        |
|                                              | Sprint Speed             | 1     | 1        | –         | –        |
|                                              | Stress Hormone           | 3     | 3        | –         | –        |
| <b>Other Measure</b>                         |                          |       |          |           |          |
|                                              | Habitat Use              | 3     | 3        | 2         | 1        |
|                                              | Frequency of Occurrence  | 1     | 1        | –         | 1        |
|                                              | Predicted Presence       | 1     | 1        | –         | –        |

**Table 2.** Cont.

| Category              | Total | Negative | No Effect | Positive |
|-----------------------|-------|----------|-----------|----------|
| <b>Impact Type</b>    |       |          |           |          |
| Ski Run               | 22    | 26       | 21        | 11       |
| Resort Infrastructure | 10    | 8        | 6         | 4        |
| Winter Tourism        | 9     | 8        | 2         | 0        |

\*indicates a country with a major ski market [38]. 'Total' refers to the total number of published studies. 'Positive', 'No Effect' and 'Negative' refer to the specific effect(s) reported in each study. Note that the total number of specific effects may not equal the total number of studies, as individual articles may have reported more than one effect (e.g. an effect for each individual species, functional group, biotic measure etc. studied).

doi:10.1371/journal.pone.0064282.t002

impacts of winter recreation on fauna. In addition, the number of publications increased over time from just one during the 1970s to 25 during the period 2000–2009 (Figure 3). Seven studies have been published since 2010 (Figure 3).

Generally, the experimental design and data quality of papers was high according to the criteria in Table S1. Most studies (34/41) were assigned to category one or two (i.e. controlled studies with adequate replication). The remainder fell into category three (7/41; replication was not adequate). No study fell into category four (i.e. control was absent).

### Geographical Area

Most studies were conducted in Europe, predominantly in Italy, Austria and Germany (Table 2). The remainder were conducted in North America (primarily in the USA) and Australia (Table 2). No studies were completed in South America, Asia or Africa. The proportion of available studies in the peer-reviewed literature conducted in Europe and North America approximates the global proportion of ski resorts in these areas i.e. European studies make up 68% of included articles and European ski areas represent approximately 62% of all ski areas [38]. In comparison, Asia and South America were clearly under-represented in the peer-reviewed literature considering the proportion of ski areas located in these regions (Table S3). On the other hand, Australia was over-represented, contributing 12.2% of peer-reviewed studies but representing only 0.2% of all ski areas (Table S3).

In terms of management, Australian and North American studies provided recommendations in the majority of their publications (4/5 and 6/8 respectively), whereas European studies did so in only 60.7% of publications (17/28). No temporal bias was apparent in the provision of recommendations for each region (Table S4).

### Taxonomic Groups

Just over one third of all studies investigated the impacts of ski infrastructure on mammals, with birds and arthropods also well represented in the literature. A smaller number of studies investigated other taxa. No studies focused on amphibians (Figure 4).

Regionally, there was variation in the taxonomic focus. Studies conducted in Europe investigated a diversity of taxonomic groups but the majority concentrated on birds and arthropods. In contrast, North American and Australian studies predominantly investigated mammals. Birds, reptiles and invertebrates were infrequently (or not) studied in these two regions (Figure 4).

### Effects of Winter Recreation

More than half the studies reported overall negative effects of human-generated disturbance on fauna in alpine and subalpine

areas ( $P < 0.001$ ). Few studies reported overall positive effects (Figure 5). The remainder reported overall non-significant ('no effect') or variable effects (i.e. a combination of positive, negative and non-significant effects dependent upon species or measure taken). For three reported measures (richness, diversity and abundance), sufficient information was provided to conduct a meta-analysis. This analysis confirmed the significant negative impact that winter recreation has on the richness ( $d = -0.60$ ,  $df = 7$ , 95% C.I.:  $-1.08$  to  $-1.02$ ; Figure 6) and diversity ( $d = -0.29$ ,  $df = 5$ , 95% C.I.:  $-0.52$  to  $-0.07$ ; Figure 6) of alpine-subalpine fauna. Winter recreation also has a negative effect on the abundance ( $d = -0.23$ ,  $df = 6$ , 95% C.I.:  $-0.70$  to  $0.25$ ; Figure 6) of fauna, however this result was not significant.

When we analysed the effects of winter recreation by taxonomic group, we found that studies generally reported negative effects for winter recreation-related disturbances on birds ( $P = 0.002$ ) and annelids; negative or variable effects on arthropods; and negative ( $P = 0.07$ ) or non-significant effects on mammals. The results reported for reptiles, nematodes and protozoans were variable and did not show consistent trend patterns (Figure 5).

We also quantified how winter recreation affected biotic responses of different taxonomic groups. From 20 measures of biotic response reported across 41 studies, we pooled similar measures to collapse our data into four composite categories. These categories were: 1) population and community descriptors; 2) population viability measures; 3) fitness measures; and 4) other measures.

When composite categories were considered for each taxonomic group, protozoan ( $n = 5$ ), nematode ( $n = 2$ ), reptile ( $n = 2$ ) and annelid ( $n = 1$ ) sample sizes were too small for meaningful analysis. For all other taxonomic groups, population and community descriptors were the most commonly reported measures (Table 2). Winter recreation was often reported to have a negative effect on population and community measures for birds ( $P = 0.18$ ) and arthropods ( $P = 0.30$ ), but these were not significant results. For mammals, the effects were almost equally likely to be positive or negative ( $P = 0.73$ ). However, when composite categories were pooled, winter recreation was significantly more likely to have a negative impact on birds ( $P = 0.004$ ). Negative impacts were also common for mammals and arthropods but these results were not significant ( $P = 0.29$  and  $P = 0.21$  respectively; Table 2).

Regionally we found that, of the continents where the effects of skiing and resort infrastructure were investigated, European studies were more likely to report negative impacts of human-generated disturbance on fauna ( $P < 0.001$ ), as were Australian studies (Figure 7). However, data from Australian studies were too sparse for statistical analysis. North American studies reported a range of effects but, again, data was too limited for statistical analysis.

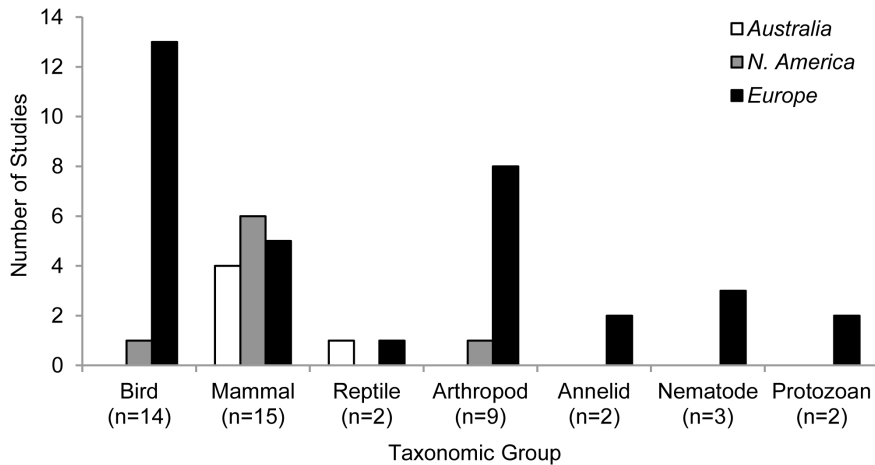

**Figure 4. Number of studies (n = 41) investigating the impacts of winter recreation on different taxa across three continents.** Four studies investigated multiple taxa, hence totals for taxonomic groups do not sum to the total number of studies analysed. doi:10.1371/journal.pone.0064282.g004

We also considered how biotic responses to winter recreation varied by region. European studies primarily reported population and community measures, while Australian studies predominantly reported population viability measures. North American studies reported these measures evenly (Table 2). When composite categories were pooled for each region, disturbances were significantly more likely to be negative in Europe ( $P < 0.001$ ). The effects of disturbance were also often reported to be negative in North America, but this trend was not significant ( $P = 0.344$ ). In contrast, Australian studies reported positive effects almost as often as negative effects ( $P = 0.687$ ; Table 2).

Finally, we analysed the effects of specific winter recreation-related disturbances on wildlife. We found that the effects of ski runs on fauna were well represented in the literature, while the effects of resort infrastructure and winter tourism were less frequently studied (Figure 8). Both ski runs and winter tourism were significantly more likely to have a negative impact on fauna ( $P = 0.020$  and  $P = 0.004$  respectively; Table 2). Resort infrastructure also had a predominantly negative effect, but this was not significant ( $P = 0.388$ ; Table 2).

## Discussion

The negative impacts of winter recreation on fauna have often been highlighted in the alpine-subalpine literature [39,40,41,42]. However this article is the first systematic study of that literature. We addressed three key questions with respect to ski developments and impacts, and from these questions found that disturbances arising from winter recreation are more likely to have negative or non-significant impacts than have positive impacts on wildlife, regardless of taxonomic group, geographical region or specific type of ski modification. But more empirical studies are urgently required as many countries and taxa that are impacted by ski resorts are inadequately represented in the peer-reviewed literature.

The notion that ski resorts and their associated disturbances are likely to have negative impacts on biodiversity in alpine and subalpine areas is not surprising, as the construction of resort infrastructure requires the removal and modification of vegetation, as well as significant fragmentation of habitat over a small area [6]. While habitat fragmentation can have a variety of impacts on fauna [43], it is likely that habitat removal has the greatest effect

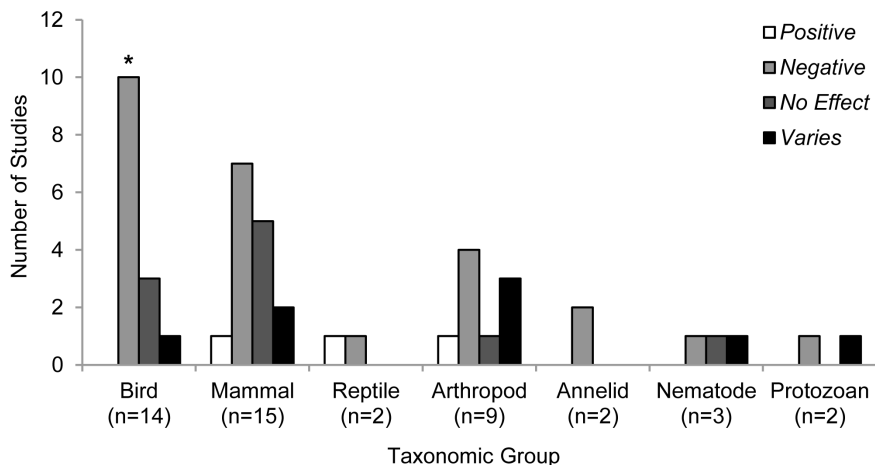

**Figure 5. Number of studies (n = 41) investigating the effects of winter recreation on seven different taxonomic groups.** \*\* $P < 0.01$  indicates a significant difference between the number of positive and negative effects reported. doi:10.1371/journal.pone.0064282.g005

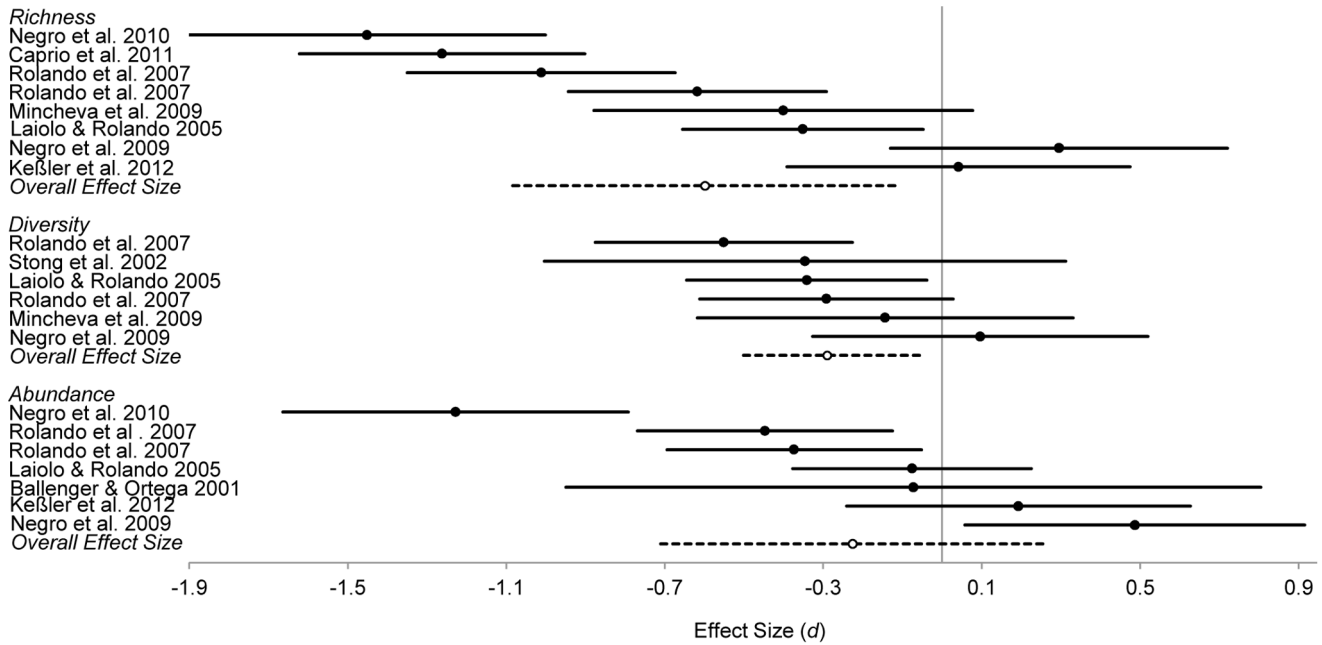

**Figure 6. Overall and individual study effect sizes ( $\pm 95\%$  C.I.) of winter recreation on fauna ( $d$ ).** Weighted effect sizes were calculated for meta-analyses on measures of richness, diversity and abundance.  
doi:10.1371/journal.pone.0064282.g006

on species with specialised habitat requirements [6]. This is particularly relevant to alpine-subalpine endemics of conservation concern such as the Mountain Pygmy Possum, *Burramys parvus*, in Australia and Raetzer's Ringlet, *Erebia christi*, in Europe [29].

However, for many species and taxa there is little or no information available in regards to the impacts of ski resorts and winter tourism. The negative effects of disturbances arising from winter recreation (such as decreased species richness or increased levels of stress hormones) were most frequently reported for mammals, birds and arthropods. These taxonomic groups are relatively well studied in the available literature and some species (and groups) have even been suggested as suitable bioindicators for alpine and subalpine ecosystems, such as the Black Grouse (*Tetrao tetrix*; [44,45]), syrphid flies [14,46] and grasshoppers [33,47]. As

the impact of skiing is more likely to be negative on these prospective bioindicators, there is the potential that the effects of the ski industry are more extensive in alpine and subalpine environments than has been documented to date. This is because bioindicators tend to possess a moderate tolerance to disturbance, so it is likely that rare or sensitive species will already have been negatively affected by human-generated habitat modifications before the bioindicators show a response [48]. In addition, as many taxa remain poorly studied in areas affected by ski resorts, the suitability of bioindicators in representing general responses of fauna to disturbance in alpine-subalpine ecosystems cannot be adequately tested, nor can the lack of a response by a bioindicator be taken to mean that the community is not being adversely affected. Thus, more research is needed to improve our

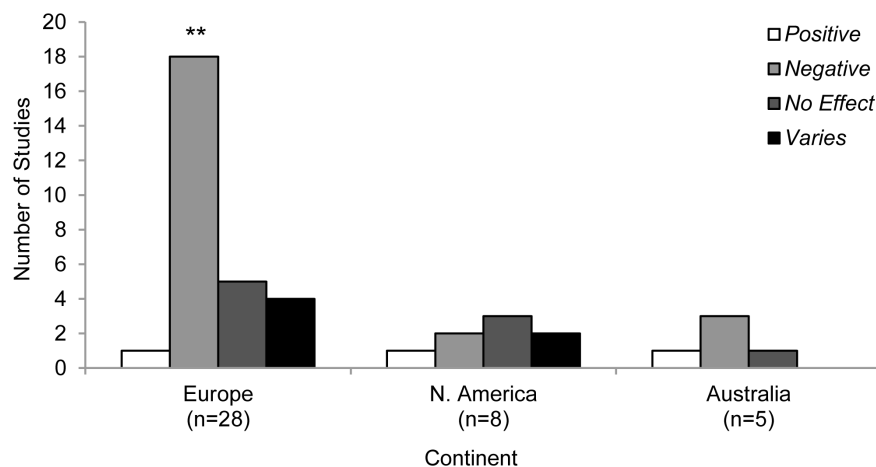

**Figure 7. Number of studies (n=41) investigating the effects of winter recreation on fauna across three continents.** \*\*P<0.01 indicates a significant difference between the number of positive and negative effects reported.  
doi:10.1371/journal.pone.0064282.g007



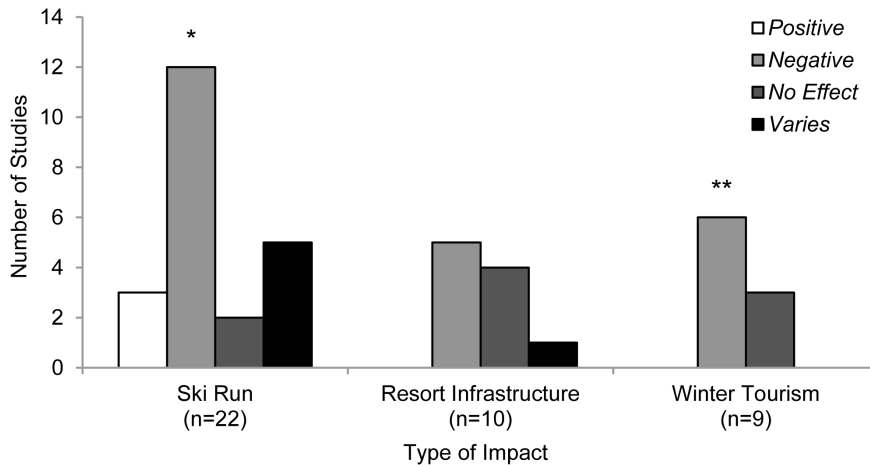

**Figure 8. Number of studies (n = 41) investigating the effect of three different types of winter recreation-related disturbance on fauna.** \* $P < 0.05$ , \*\* $P < 0.01$  indicate a significant difference between the number of positive and negative effects reported. doi:10.1371/journal.pone.0064282.g008

understanding of community interactions and species-level responses to disturbances in these environments.

We also need to improve our regional understanding of the impacts of winter recreation on wildlife. Most studies about the impacts of ski resorts on fauna come from Europe, with a smaller number of contributions from North America and Australia. Given that there are around 6000 ski areas located in more than 70 countries across the globe [38], many alpine and subalpine faunal communities around the world have not been studied. Thus, there is no regionally-relevant information about the effects of winter recreation on wildlife in many parts of the world. This is a concern as some countries with medium-sized developments (i.e. ski areas with 10 or more ski lifts) or large ski developments (i.e. ski areas with one or more major resorts) such as Andorra, New Zealand, Japan, China and Argentina [38] have not been the focus of any empirical research published in the peer-reviewed literature. Yet, three of these countries have been listed as global biodiversity hotspots (New Zealand, Japan and China; [49]). In addition, according to the IUCN red list, many of these nations contain species of conservation concern in ski resort areas [29].

Finally, we must recognise that all types of winter recreation-related disturbance are more likely to have negative than positive impacts on fauna (particularly ski runs and winter tourism). However, investigations into the effects of resort infrastructure and winter tourism still need more attention, as published studies are uncommon. Identifying the effects of specific winter recreation-related disturbances is important as it will help to target management strategies for ski resorts. For example, if direct human provocation of fauna during winter has a negative effect on the fitness of individuals or populations, then an effective management strategy would involve the reduced access of tourists to areas where nests, dens or hibernacula are located. Other strategies such as modifying grooming techniques or reducing the extent of artificial snowing may not significantly improve the fitness levels of target populations. Thus, to improve conservation outcomes of fauna through targeted management strategies, more empirical studies are urgently needed.

### Implications for Biodiversity Conservation

There has been an almost exponential increase in the number of scientific articles published investigating the impacts of winter recreation on fauna since the 1970s. However, at the same time

the ski industry has seen a long period of expansion and consolidation [15]. For example, Japan has opened more than 450 new ski fields across the country since 1970, averaging more than 100 new ski fields per decade [50]. Therefore, while the increase in publications is positive for biodiversity conservation in alpine and subalpine areas, it is likely that ecological research has not kept pace with the expansion of the ski industry.

Our systematic review and meta-analysis indicates that significant knowledge gaps remain about the impacts of winter recreation on fauna. Globally, ski resorts are being managed with little empirical evidence (only 27 studies provide specific management actions), thus limiting the implementation of ecologically-sound practices (e.g. minimising damage to native vegetation [11]). There are indications that winter recreation is likely to have a negative impact but the available information is far from conclusive. Less intensively studied taxa and countries show inconsistent effects, and the impacts of ski resorts in unstudied regions and on unstudied taxa remain unknown. Thus there is an urgent need for more regional research if biodiversity is to be effectively conserved, as we cannot confidently assume that the effects reported in one set of regional studies (even on the same taxa) will apply elsewhere.

To best direct the research conducted in alpine and subalpine areas, we need to determine what we want from ecosystems. If the aim is to preserve the original community structure of fauna inhabiting areas impacted by ski tourism, we must rethink what we measure. Community composition and dominant species are often altered by disturbances arising from winter recreation [12,46,51] and specialist species are sometimes lost, despite “unchanged” overall species richness [14,46,52]. Yet, measures like species richness and abundance are the most commonly reported biotic measures (17/41 studies). Reporting measures of richness and abundance may improve study comparability. But to better understand disturbed communities in relation to reference communities, it would be more useful if measures of community composition and species dominance are also recorded [14].

It is also essential that the research in alpine-subalpine ecosystems consider long-term impacts (effects over greater than 10 years; [53]) of ski resorts on fauna. This is because alpine and subalpine vegetation regenerates slowly due to restricted growing seasons [54,55], so the effects of winter recreation-related disturbances like ski-run construction may take decades to begin

to reverse [33,42,56,57]. However, long-term ecological studies are rare (only five studies investigated the effects of development over more than 10 years), thus our knowledge of the cumulative effects of development and the efficacy of management actions is limited.

### Caveats

We present a review of the global, peer-reviewed literature available to date. However, care needs to be taken when drawing conclusions from the results presented for several reasons. Firstly, “grey” literature was not included in this review due to the difficulty in obtaining this literature in a consistent and balanced way. Without the grey literature, areas identified as knowledge gaps, and regions identified as lacking in research output, may be overemphasized. That said, this highlights the fact that all research needs to be published via widely accessible avenues so that current research and management recommendations are available for use by all researchers, practitioners and government bodies.

A second caveat is that the small number of peer-reviewed papers available, the variability in methodologies, taxa studied and inconsistencies in reporting specific measures, precluded a more comprehensive meta-analysis. Thirdly, binomial tests were used to analyse the available data but due to the limited sample sizes, statistical significance could not always be reliably assessed, hence true effects occurring may not be emphasized.

### Supporting Information

**Table S1** Systematic Review and Meta-analysis Proforma. (DOCX)

### References

- Caprio E, Chamberlain DE, Isaia M, Rolando A (2011) Landscape changes caused by high altitude ski-pistes affect bird species richness and distribution in the Alps. *Biol Conserv* 144: 2958–2967.
- Haslett JR (1997) Insect communities and the spatial complexity of mountain habitats. *Glob Ecol Biogeogr Lett* 6: 49–56.
- Negro M, Isaia M, Palestirini C, Schoenhofner A, Rolando A (2010) The impact of high-altitude ski pistes on ground-dwelling arthropods in the Alps. *Biodivers Conserv* 19: 1853–1870.
- Körner C, Paulsen J, Spehn EM (2011) A definition of mountains and their bioclimatic belts for global comparisons of biodiversity data. *Alp Bot* 121: 73–78.
- Löve D (1970) Subarctic and subalpine: Where and what? *Arct Antarct Alp Res* 2: 63–73.
- Strong AM, Rimmer CC, McFarland KP, Hagen K (2002) Effects of mountain resorts on wildlife. *Vt Law Rev* 26: 689–716.
- Strong AM, Dickert CA, Bell RT (2002) Ski trail effects on a beetle (Coleoptera: Carabidae, Elateridae) community in Vermont. *J Insect Conserv* 6: 149–159.
- Green K, Osborne W (1994) *Wildlife of the Australian Snow-Country*. Sydney, Australia: Reed. 200 p.
- Arlettaz R, Patthey P, Baltic M, Leu T, Schaub M, et al. (2007) Spreading free-riding snow sports represent a novel serious threat for wildlife. *Proc R Soc Lond B Biol Sci* 274: 1219–1224.
- Thiel D, Jenni-Eiermann S, Braunisch V, Palme R, Jenni L (2008) Ski tourism affects habitat use and evokes a physiological stress response in capercaillie *Tetrao urogallus*: A new methodological approach. *J Appl Ecol* 45: 845–853.
- Negro M, Isaia M, Palestirini C, Rolando A (2009) The impact of forest ski-pistes on diversity of ground-dwelling arthropods and small mammals in the Alps. *Biodivers Conserv* 18: 2799–2821.
- Szymkowiak P, Gorski G (2004) Spider communities in the contact zone between open areas and spruce forest in the Karkonosze National Park. *Opera Corcontica* 41: 309–315.
- Geneletti D (2008) Impact assessment of proposed ski areas: A GIS approach integrating biological, physical and landscape indicators. *Environ Impact Assess Rev* 28: 116–130.
- Haslett JR (1991) Habitat deterioration on ski slopes: Hoverfly assemblages (Diptera: Syrphidae) occurring on skied and unskied subalpine meadows in Austria. In: Ravera O, editor. *Terrestrial and Aquatic Ecosystems: Perturbation and Recovery*. Chichester, UK: Ellis Horwood. 366–371.
- Hudson S (2003) Winter sport tourism. In: Hudson S, editor. *Sport and Adventure Tourism*. Binghamton, USA: The Haworth Hospitality Press. 89–123.

**Table S2** Examples of positive, non-significant and negative effects for the four composite categories. (DOCX)

**Table S3** Comparison of the contribution of seven regions to the peer-reviewed literature investigating the impacts of ski-related disturbances on wildlife, compared with the proportion of all ski areas located in those seven regions (based on approximate numbers of ski areas provided by [38]). (DOCX)

**Table S4** Provision of management recommendations by region and time period. “Y” indicates that a recommendation was provided; “N” indicates that a recommendation was not provided. (DOCX)

**Checklist S1 PRISMA Checklist**. (DOC)

**Reference List S1 Publications included in the Systematic Review and Meta-Analysis**. (DOCX)

### Acknowledgments

We would like to thank J. Stein for his help in constructing our global map. We would also like to thank L. Rayner, D. Stojanovic, C. Pickering and one anonymous reviewer for reading the manuscript and providing comments.

### Author Contributions

Conceived and designed the experiments: CFS JTW DBL. Performed the experiments: CFS. Analyzed the data: CFS JTW DBL. Wrote the paper: CFS JTW DBL.

- WWF (2005) *Ecoregion Conservation Plan for the Alps*. Available: [http://awsassets.panda.org/downloads/ecoregion\\_conservation\\_plan\\_alps.pdf](http://awsassets.panda.org/downloads/ecoregion_conservation_plan_alps.pdf). Accessed 19 November 2012.
- Pickering C, Johnston S, Green K, Enders G (2003) Impacts of nature tourism on the Mount Kosciuszko alpine area, Australia. In: Buckley R, Pickering C, Weaver DB, editors. *Nature-Based Tourism, Environment and Land Management*. Oxon, UK: CABI Publishing. 123–135.
- Pickering CM, Harrington J, Worboys G (2003) Environmental impacts of tourism on the Australian Alps protected areas - Judgments of protected area managers. *Mt Res Dev* 23: 247–254.
- Green K, Sanecki G (2006) Immediate and short-term responses of bird and mammal assemblages to a subalpine wildfire in the Snowy Mountains, Australia. *Austral Ecol* 31: 673–681.
- IPCC (2007) In: Parry ML, Canziani OF, Palutikof JP, van der Linden PJ, Hanson CE, editors. *Contribution of Working Group II to the Fourth Assessment Report of the Intergovernmental Panel on Climate Change, 2007*. Available: [http://www.ipcc.ch/publications\\_and\\_data/ar4/wg2/en/contents.html](http://www.ipcc.ch/publications_and_data/ar4/wg2/en/contents.html). Accessed 19 November 2012.
- Whetton PH, Haylock MR, Galloway R (1996) Climate change and snow-cover duration in the Australian Alps. *Clim Change* 32: 447–479.
- Agrawala S (2007) The European Alps: Location, economy and climate. In: Agrawala S, editor. *Climate Change in the European Alps: Adapting Winter Tourism and Natural Hazards Management*. Paris, France: OECD. 1–23.
- Hennessy KJ, Whetton PH, Walsh K, Smith IN, Bathols JM, et al. (2008) Climate change effects on snow conditions in mainland Australia and adaptation at ski resorts through snowmaking. *Climate Res* 35: 255–270.
- UNEP (2007) *Global Outlook for Ice & Snow*. Arendal, Norway: UNEP/GRID-Arendal.
- Beniston M (2012) Is snow in the Alps receding or disappearing? *WIREs Clim Change* 2012. doi: 10.1002/wcc.179.
- Lehr C, Ward PJ, Kumm M (2012) Impact of large-scale climate oscillations on snowfall-related climate parameters in the world’s major downhill ski areas: A review. *Mt Res Dev* 32: 431–445.
- Elssasser H, Burki R (2002) Climate change as a threat to tourism in the Alps. *Climate Res* 20: 253–257.
- Broome LS (2001) Intersite differences in population demography of mountain pygmy-possums *Burrumys parvus* Broom (1986–1998): Implications for metapopulation conservation and ski resorts in Kosciuszko National Park, Australia. *Biol Conserv* 102: 309–323.

29. IUCN (2012) The IUCN Red List of Threatened Species. Available: <http://www.iucnredlist.org/>. Accessed 12 June 2012.
30. Clemann N (2002) A herpetofauna survey of the Victorian alpine region, with a review of threats to these species. *Victorian Nat* 119: 48–58.
31. Green K (2005) Winter arousal of a high mountain skink *Pseudemoia ravelinsoni* following hibernation beneath the snow. *Herpetofauna* 35: 95–97.
32. Hadley GL, Wilson KR (2004) Patterns of density and survival in small mammals in ski runs and adjacent forest patches. *J Wildl Man* 68: 288–298.
33. Illich IP, Haslett JR (1994) Responses of assemblages of Orthoptera to management and use of ski slopes on upper sub-alpine meadows in the Austrian Alps. *Oecologia* 97: 470–474.
34. Laiolo P, Rolando A (2005) Forest bird diversity and ski-runs: A case of negative edge effect. *Anim Conserv* 8: 9–16.
35. Borenstein M, Hedges LV, Higgins JPT, Rothstein HR (2009) *Introduction to Meta-Analysis*. Chichester, UK: John Wiley and Sons Inc. 450 p.
36. Conover WJ (1999) *Practical Nonparametric Statistics*. New York, USA: John Wiley and Sons Inc. 592 p.
37. Rosenberg MS, Adams DC, Gurevitch J (1999) *MetaWin. Statistical Software for Meta analysis. Version 2.0*. Sunderland, MA: Sinauer Associates. 133p.
38. Vanat L (2012) *International Report on Mountain Tourism: Overview of the Key Industry Figures for Ski Resorts*. Geneva: Vanat. 84 p.
39. Amo L, Lopez P, Martin J (2007) Habitat deterioration affects body condition of lizards: A behavioral approach with *Iberolacerta cyreni* lizards inhabiting ski resorts. *Biol Conserv* 135: 77–85.
40. Miquet A (1986) A contribution to the study of the relation between the Black Grouse (*Tetrao tetrix* L., Tetraonidae) and winter tourism in Haute-Tarentaise. *Acta Oecol* 7: 325–335.
41. Sanecki GM, Green K, Wood H, Lindenmayer D (2006) The implications of snow-based recreation for small mammals in the subnivean space in south-east Australia. *Biol Conserv* 129: 511–518.
42. Schatz H (1983) The influence of tourism on mesoarthropods in the high mountains. *Ber Naturwiss-Med Ver Innsbruck* 70: 93–97.
43. Fahrig L (2003) Effects of habitat fragmentation on biodiversity. *Annu Rev Ecol Evol Syst* 34: 487–515.
44. Braunsch V, Patthey P, Arlettaz RL (2011) Spatially explicit modeling of conflict zones between wildlife and snow sports: Prioritizing areas for winter refuges. *Ecol Appl* 21: 955–967.
45. Storch I (2007) *Grouse: Status, Survey and Conservation Action Plan 2006–2010*. Gland, Switzerland and Fordingbridge, UK: IUCN and World Pheasant Association. 125 p.
46. Haslett JR (1988) Assessing the quality of alpine habitats: Hoverflies (Diptera: Syrphidae) as bio-indicators of skiing pressure on alpine meadows in Austria. *Zool Anz* 220: 179–184.
47. Keßler T, Cierjacks A, Ernst R, Dziöck F (2012) Direct and indirect effects of ski run management on alpine Orthoptera. *Biodivers Conserv* 21: 281–296.
48. Noss RF (1990) Indicators for monitoring biodiversity: A hierarchical approach. *Conserv Biol* 4: 355–364.
49. Conservation International (2012) *The Biodiversity Hotspots*. Available: [http://www.conservation.org/where/priority\\_areas/hotspots/Pages/hotspots\\_main.aspx](http://www.conservation.org/where/priority_areas/hotspots/Pages/hotspots_main.aspx) Accessed 14 June 2012.
50. Kureha M (2008) Changing ski tourism in Japan: From mass tourism to ecotourism? *Global Environ Res* 12: 137–144.
51. Jokimaki J, Kaisanlahti-Jokimaki ML, Huhta E, Siikamaki P (2007) Bird species as indicators of environmental changes at tourist destinations. In: Jokimaki J, Kaisanlahti-Jokimaki ML, Tuulentie S, Laine K, Uusitalo M, editors. *Environment, Local Society and Sustainable Tourism*. Rovaniemi, Finland: University of Lapland. 13–22.
52. Hammelbacher K, Mühlenberg M (1986) Laufkafer (Carabidae) und weberknechtarten (Opiliones) als bioindikatoren für skibelastung auf almfleichen. *Nat Landsch* 61: 463–466.
53. Lindenmayer DB, Likens GE (2010) The science and application of ecological monitoring. *Biol Conserv* 143: 1317–1328.
54. Billings WD (1973) Arctic and alpine vegetations - Similarities, differences, and susceptibility to disturbance. *Bioscience* 23: 697–704.
55. Billings WD, Bliss LC (1959) An alpine snowbank environment and its effects of vegetation, plant development, and productivity. *Ecology* 40: 388–397.
56. Lüftenegger G, Foissner W, Adam H (1986) Der einfluss organischer und mineralischer dunger auf die bodenfauna einer planierten, begrunten schipiste oberhalb der waldgrenze. *Z Vegetationst* 9: 149–153.
57. Urbanska KM (1997) Restoration ecology research above the timberline: Colonization of safety islands on a machine-graded alpine ski run. *Biodivers Conserv* 6: 1655–1670.
